# Supplementary material for: Carbohydrate and Amino Acid Dynamics during Grain Growth in Four Temperate Cereals under Well-Watered and Water-Limited Regimes
Source: MDPI journal article supplement (doi:10.3390/agronomy11081516), 2021-07-29
Supplement: s1 [file s1]

**Table S1.** Statistical analysis of the time variation of leaf photosynthesis (An) and leaf water soluble carbohydrates (WSCs) during the grain filling period, and WSCs (g 100 g DW<sup>-1</sup>) in flag leaves of the four cereal species shown in Figure 1 and 2, respectively.

| Leaf photosynthesis (An) and leaf water soluble carbohydrates (WSCs) during the grain filling period |              |                                     |                                     |                                     |                                     |
|------------------------------------------------------------------------------------------------------|--------------|-------------------------------------|-------------------------------------|-------------------------------------|-------------------------------------|
| Trait                                                                                                | water regime | Triticale                           | Bread wheat                         | Durum wheat                         | Barley                              |
| An<br>( $\mu\text{mol m}^{-2} \text{s}^{-1}$ )                                                       | WW           | $y = -0.0015x^2 - 0.3084x + 25.959$ | $y = -0.0196x^2 + 0.6333x + 14.306$ | $y = -0.0364x^2 + 0.9699x + 14.515$ | $y = -0.035x^2 + 0.8631x + 7.8679$  |
|                                                                                                      | WL           | $y = 0.001x^2 - 0.3891x + 24.054$   | $y = -0.0044x^2 - 0.0852x + 16.736$ | $y = -0.0322x^2 + 0.6752x + 14.208$ | $y = -0.0475x^2 + 1.132x + 3.3052$  |
| Leaf WSC<br>(g 100gDW <sup>-1</sup> )                                                                | WW           | $y = -0.02x^2 + 1.3485x - 13.955$   | $y = -0.0173x^2 + 1.1678x - 12.195$ | $y = -0.0278x^2 + 1.2674x - 7.8762$ | $y = -0.0012x^2 + 0.2897x + 1.3235$ |
|                                                                                                      | WL           | $y = -0.0358x^2 + 2.0371x - 20.246$ | $y = -0.0367x^2 + 2.0815x - 21.591$ | $y = -0.0321x^2 + 1.3912x - 8.4343$ | $y = -0.0048x^2 + 0.3044x + 3.0261$ |
| WSCs (g 100 g DW <sup>-1</sup> ) in flag leaves of the four cereal species                           |              |                                     |                                     |                                     |                                     |
| WSC                                                                                                  |              | Triticale                           | Bread wheat                         | Durum wheat                         | Barley                              |
| Glucose                                                                                              |              | $y = -0.0032x^2 + 0.1576x - 0.7892$ | $y = -0.003x^2 + 0.1619x - 1.1684$  | $y = -0.0002x^2 + 0.021x + 0.1113$  | $y = 0.0044x^2 - 0.1049x + 1.9803$  |
| Fructose                                                                                             |              | $y = -0.0035x^2 + 0.1918x - 1.5259$ | $y = -0.0071x^2 + 0.3954x - 4.0319$ | $y = 0.0003x^2 + 0.0065x + 0.0829$  | $y = 0.0042x^2 - 0.0939x + 1.5208$  |
| Sucrose                                                                                              |              | $y = -0.0176x^2 + 1.0739x - 11.533$ | $y = -0.0164x^2 + 0.9827x - 10.56$  | $y = -0.0214x^2 + 0.9035x - 5.6063$ | $y = -0.0119x^2 + 0.472x - 1.2847$  |
| Maltose                                                                                              |              | $y = -0.0044x^2 + 0.3188x - 3.9596$ | $y = 0.0033x^2 - 0.1373x + 2.0515$  | $y = -0.0173x^2 + 0.7891x - 6.9203$ | $y = 0.0064x^2 - 0.2036x + 1.9038$  |

**Table S2.** Effect of water deficit on the water-soluble carbohydrate content (g 100 g DW<sup>-1</sup>) in leaves and grain, from the grain filling stage to maturity (in days after anthesis; DAA). Values are differences between the water-limited (WL) and the well-watered (WW) regime. Values corresponds to the WL regime.

| WL                | no effect |        | WW     |        |                   |          |       |        |       |         |
|-------------------|-----------|--------|--------|--------|-------------------|----------|-------|--------|-------|---------|
|                   |           |        |        |        |                   |          |       |        |       |         |
| Leaves            |           |        |        |        | Grain development |          |       |        |       |         |
| Triticale (DAA)   | 15        | 22     | 29     | 36     | 15                | 22       | 29    | 36     | 43    | 64      |
| Gluc              | 0.42***   | 0.32   | 0.43   | -0.64  | 0.14              | -0.68*** | -0.34 | 0.26   | -0.34 | 0.16    |
| Fruc              | 0.30*     | 0.39   | 0.48*  | -0.52  | 0.02              | -0.66*** | -0.25 | -0.09  | -0.41 | 1.09    |
| Suc               | 0.35      | 0      | -0.1   | -0.11  | -0.04             | -0.21    | -0.1  | -0.18  | -0.01 | 0       |
| Malt              |           | 0.33   | 0.24   | -0.11  | -0.26             | -0.53**  | 1.09* | -0.08  | 0.1   | -0.01   |
| Bread wheat (DAA) | 15        | 22     | 29     | 36     | 15                | 22       | 29    | 26     | 43    | 64      |
| Gluc              | 0.41      | 0.26   | 1.11*  | -0.47  | -0.11             | -0.17    | -0.22 | 0.05   | -0.12 | -0.24*  |
| Fruc              | 0.71***   | 0.81   | 2.27** | -0.36  | -0.1              | -0.16    | -0.14 | 0.02   | -0.03 | -0.25*  |
| Suc               | -0.29     | -0.11  | -0.17  | -0.24* | -0.08             | -0.03    | -0.14 | -0.03  | 0.01  | -0.2    |
| Malt              |           | 0.06   | -0.15  | -0.07  | -0.3              | -0.05    | 0.03  | -0.17  | -0.06 | -0.12** |
| Durum wheat (DAA) | 8         | 15     | 22     | 29     | 8                 | 15       | 22    | 29     | 36    | 57      |
| Gluc              | 0.37      | -0.09  | -0.05  | 1.95   | -0.13             | -0.15    | -0.34 | -0.15  | -0.01 | -0.18*  |
| Fruc              | 0.21      | 0.02   | 2.06   | 0.47   | -0.47             | -0.15    | -0.16 | -0.41* | -0.13 | -0.11** |
| Suc               | -0.2      | 0.04   | -0.1   | -0.21  | -0.34             | 0.02     | 0.08  | 0.02   | -0.21 | 0.11    |
| Malt              |           | 0.35   | 0.02   | -0.36  | 0.37              | -0.07    | -0.16 | -0.36  | -0.21 | -0.02   |
| Barley (DAA)      | 4         | 11     | 18     | 25     | 4                 | 11       | 18    | 25     | 32    | 53      |
| Gluc              | 0.67      | 0.91*  | 0.3    | -0.23  |                   | -0.50*   | 0.07  | 0.51   | -0.22 | -0.34*  |
| Fruc              | 0.41      | 1.19** | 0.32   | -0.12  |                   | -0.40**  | 0.39  | -0.78  | 0.39  | -0.41   |
| Suc               | 2.47**    | 0.04   | 0.01   | 0.02   |                   | -0.16    | 0.17  | 0.1    | 0.17  | -0.05   |
| Malt              |           | -0.45  | 0.72*  | 0.67   |                   | -0.06    | 0.32  | -0.11  | -0.46 | 0.03    |

Statistical differences ( $p < 0.05$  \*;  $p < 0.01$  \*\*;  $p < 0.001$  \*\*\*)

**Table S3.** Statistical analysis of the time variation of different water-soluble carbohydrates (WSCs) (g 100 g DW<sup>-1</sup>) in grain for the four cereal species shown in Figure 3.

| WSC      | Triticale                          | Bread wheat                         | Durum wheat                         | Barley                              |
|----------|------------------------------------|-------------------------------------|-------------------------------------|-------------------------------------|
| Glucose  | $y = 0.0004x^2 - 0.0556x + 1.8417$ | $y = 2E-05x^2 - 0.0125x + 0.7056$   | $y = -0.0003x^2 - 0.0031x + 0.9282$ | $y = 0.0005x^2 - 0.0563x + 1.6519$  |
| Fructose | $y = 0.0016x^2 - 0.1679x + 4.3619$ | $y = 0.0004x^2 - 0.0534x + 1.7715$  | $y = 0.0005x^2 - 0.0679x + 2.1308$  | $y = 0.0016x^2 - 0.1482x + 3.385$   |
| Sucrose  | $y = 0.0013x^2 - 0.1633x + 6.1733$ | $y = 0.0013x^2 - 0.1534x + 5.4881$  | $y = 0.0006x^2 - 0.1275x + 5.7514$  | $y = -7E-05x^2 - 0.0734x + 4.8525$  |
| Maltose  | $y = -0.0004x^2 + 0.031x - 0.1454$ | $y = -0.0007x^2 + 0.0562x - 0.4585$ | $y = -0.0009x^2 + 0.059x - 0.2231$  | $y = -0.0002x^2 + 0.0073x + 0.4861$ |

**Table S4.** Statistical analysis of the relationships between starch in grain, and water-soluble carbohydrates (WSCs) in grain (A, B) and mean grain weight (C, D) for the four cereal species under the well-watered (WW) and water-limited (WL) regimes shown in Figure 4.

|                     | WW                                 | WL                                 |
|---------------------|------------------------------------|------------------------------------|
| <b>WSC</b>          |                                    |                                    |
| Triticale           | $y = 6E-07x^2 - 0.0043x + 10.02$   | $y = 4E-07x^2 - 0.0037x + 9.89$    |
| Bread wheat         | $y = 3E-07x^2 - 0.0032x + 9.12$    | $y = 5E-07x^2 - 0.0034x + 8.38$    |
| Durum wheat         | $y = -1E-06x^2 + 0.0021x + 7.17$   | $y = -2E-06x^2 + 0.0043x + 4.51$   |
| Barley              | $y = 2E-08x^2 - 0.0017x + 8.51$    | $y = -7E-07x^2 + 0.0016x + 5.83$   |
| <b>Grain weight</b> |                                    |                                    |
| Triticale           | $y = 2.1045x^2 + 5.2178x + 2.2501$ | $y = 5.0352x^2 - 3.1975x + 5.8235$ |
| Bread wheat         | $y = 1.0299x^2 + 13.707x - 9.1689$ | $y = -5.6353x^2 + 40.67x - 30.724$ |
| Durum wheats        | $y = 6.3273x^2 - 8.5674x + 5.7824$ | $y = 4.2552x^2 - 2.5776x + 5.9184$ |
| Barley              | $y = 3.1155x^2 - 4.83x + 7.4019$   | $y = 2.3194x^2 - 0.296x + 6.8797$  |

**Table S5.** Effect of water deficit on amino acid concentration ( $\mu\text{mol g DW}^{-1}$ ) in leaves and grain, from the grain filling stage to harvest (in days after anthesis; DAA). Values are differences between the water-limited (WL) and well-watered (WW) regime. Value corresponds to the WL regime.

|                          | Leaves |       |        |       | Grain development |        |        |       |       |        |
|--------------------------|--------|-------|--------|-------|-------------------|--------|--------|-------|-------|--------|
|                          | 15     | 22    | 29     | 36    | 15                | 22     | 29     | 36    | 43    | 64     |
| <b>Triticale (DAA)</b>   |        |       |        |       |                   |        |        |       |       |        |
| Arg                      | 0.18   | 0.25  | 0.09*  | 0.08  | 0.2               | -0.95* | -0.13  | 0.14  | -0.37 | 0.06   |
| Asn                      |        | -0.01 | 0.01   | 0.07  | -0.64             | -0.75  | 0.05   | 0.71  | 0.98  | 0.62   |
| Asp                      | -0.29  | -0.06 | 0.03   | 0.01  | 0.2               | -0.25  | -0.16  | 0.02  | -0.06 | 0.16   |
| GABA                     | -0.06  | 0     | -0.01  | -0.01 | 0.06              | -0.48  | -0.04  | 0.02  | -0.05 | 0.01   |
| Gln                      | -0.1   | 0.01  | 0.03** | 0.08  | -0.16             | 0.5    | 0.2    | -0.04 | -0.25 | 0.02   |
| Glu                      | -0.44  | -0.03 | 0.01   | -0.02 | 0.42              | 2.13   | -1.15  | 0.83  | -0.25 | 0.09   |
| Gly                      | -0.39  | 0.01  | 0.01   | 0.03  | 0.51              | 2.75*  | -0.52  | -0.01 | -0.74 | 0.01   |
| His                      | -0.06  | -0.01 | -0.02  |       | 0.04              | -0.11* | -0.02  | 0.01  | 0.24  | 0.02   |
| Ile                      | -0.13  | 0.05  | 0.06   | 0.09  | 0.47              | -0.26  | -0.63  | -0.31 | -0.46 | 0.01   |
| Leu                      | -0.11  | 0.06  | 0.05   | 0.07  | -1.68             | -0.47  | -0.51  | 0.17  | -0.27 | 0.02   |
| Lys                      | -0.02  | 0     | 0.01   | 0     | 0.08              | 0.02   | -0.13  | 0.04  | -0.18 | 0.04   |
| Met                      | -0.06  | -0.01 | 0      | 0     | 0.05              | -0.07  | -0.02  | 0.02  | -0.06 | -0.01  |
| Phe                      | -0.15  | 0.05  | 0.07   | 0.07  | 0.11              | -0.05  | -0.24  | 0.06  | -0.08 | 0.01   |
| Pro                      | -0.39  | -0.02 | 0.05   | 0.03  | 1.48              | -4.36* | -0.48  | 0.25  | -0.16 | 0.2    |
| Ser                      | 0.1    | -0.06 | 0.04   | 0.05  | 0.3               | -0.14  | -0.38  | 0.09  | -0.52 | 0.01   |
| Thr                      | -0.07  | -0.02 | 0      | 0.03  | -0.07             | 0.07   | -0.17  | 0.12  | -0.24 | -0.03  |
| Tyr                      | -0.12  | 0.01  | 0.02   | 0.05  | -0.03             | -0.22  | -0.14  | -0.01 | -0.04 | 0.02   |
| Val                      | -0.15  | 0.07  | 0.06   | 0.21  | 0.39              | 0.26   | -0.57  | 0.18  | -0.45 | 0.04   |
| <b>Bread wheat (DAA)</b> |        |       |        |       |                   |        |        |       |       |        |
| Arg                      | -0.27  | -0.17 | 0      | 0.02  | 1.08              | -0.02  | -0.39  | 0.03  | 0.12  | 0.02   |
| Asn                      | 0.20*  | 0.25  | -0.01  | 0.37  | 3.08              | -0.42  | -0.48  | 3.21* | -0.97 | -0.6   |
| Asp                      | -0.24  | -0.04 | 0.01   | -0.01 | 1.08*             | -0.09  | -0.44* | 0     | -0.19 | -0.09  |
| GABA                     | -0.09  | 0.01  | -0.01  | -0.05 | 1.37              | -0.13  | -2.2   | -0.04 | 0     | 0.02   |
| Gln                      | -0.04  | 0.13  | 0.03   | 0.08  | 3.86              | -0.4   | 0.07   | 0.1   | 0.42  | -0.12  |
| Glu                      | -0.12  | -0.01 | 0.01   | -0.04 | 2.60*             | 0.2    | -1.27  | -0.13 | 0.64  | -0.31  |
| Gly                      | 0.03*  | 0.01  | 0      | 0     | 1.56              | 0.33   | -1.33* | -0.13 | 0.48  | -0.04  |
| His                      | 0.04   |       |        |       | 0.04              | -0.03  | -0.06  | 0.01  | -0.03 | -0.05  |
| Ile                      | 0.07   | 0.11  | 0.11   | 0.03  | 0.85**            | 0.11   | -0.78  | -0.45 | 0.03  | 0.01   |
| Leu                      | 0.09   | 0.09* | 0.19   | 0.04  | 0.65**            | -0.04  | -0.80* | -0.21 | 0.05  | 0      |
| Lys                      | 0.12   | 0.02  | 0.03*  | -0.03 | 0.53**            | -0.01  | -0.28  | -0.03 | 0.05  | -0.03  |
| Met                      | 0.03   | 0.01  | 0.02   | -0.04 | 0.26*             | -0.05* | -0.06  | 0     | 0.01  | -0.01  |
| Phe                      | 0.12*  | 0.10* | 0.12   | 0.07  | 0.55*             | -0.06  | -0.34* | -0.02 | 0.04  | -0.01  |
| Pro                      | -0.07  | -0.02 | 0.14   | 0     | 2.71*             | -0.73  | 0.01   | -0.05 | 0.09  | -0.01  |
| Ser                      | -0.07  | -0.05 | -0.02  | 0.06  | 0.52**            | -0.03  | -0.64* | -0.07 | 0.14  | -0.02  |
| Thr                      | -0.05  | 0.03  | -0.22  | 0.01  | 0.96**            | 0      | -0.34  | -0.01 | 0.06  | -0.09  |
| Tyr                      | 0.04   | 0.07  | 0.07   | 0     | 1.09              | -0.02  | -0.31* | -0.06 | -0.06 | 0      |
| Val                      | 0.13*  | 0.14  | 0.09   | 0.06  | 2.06**            | 0      | -1.00* | -0.24 | 0.14  | -0.01  |
| <b>Durum wheat (DAA)</b> |        |       |        |       |                   |        |        |       |       |        |
| Arg                      | -0.1   | -0.02 | 0      | 0.06  | -0.07             | -0.25  | -0.74  | -0.58 | -1.29 | 0.03*  |
| Asn                      |        | 0.26  | -0.01  | 0.14  | 7.46              | -1.74  | -2.26  | 2.70* | 0.25  | 0.88** |

|                     |          |           |           |           |          |           |           |           |           |           |
|---------------------|----------|-----------|-----------|-----------|----------|-----------|-----------|-----------|-----------|-----------|
| Asp                 | 0.42     | 0         | 0.01      | 0.02      | -0.5     | -0.52*    | -0.12     | 0.90**    | -0.76     | 0.09      |
| GABA                | 0.18     | -0.15     | -0.01     | 0         | -0.45    | -0.13     | -0.29     | -0.06     | -0.21     | 0.03      |
| Gln                 | 0.2      | 0.02      | 0.03      | 0.05      | 5.07     | 0.19      | -1.39     | -0.13     | -0.35     |           |
| Glu                 | 0.27     | -0.02     | 0.01      | 0.01      | -0.08    | -0.81     |           | 1.85      | -0.13     | 0.12      |
| Gly                 | 0.34     | -0.03     | 0         | 0.05      | 0.32     | -0.34     | -0.93     | -1.48     | -0.58     | 0.15      |
| His                 | 0.01     |           |           |           |          | -0.09**   | -0.07     | -0.03     | -0.1      |           |
| Ile                 | 0.01     | -0.03     | 0.11      | 0.07      | 0.54     | -0.19     | 0.14      | -1.58*    | -0.32     | 0.01      |
| Leu                 | 0.02     | -0.02     | 0.19      | 0.11      | 0.51     | -0.88*    | -0.71     | -0.93     | -0.18     | 0.01      |
| Lys                 | 0.01     | -0.02     | 0.03*     | 0.01      | 0.12     | -0.21     | -0.26     | -0.3      | -0.07     |           |
| Met                 | -0.01    | -0.01     | 0.02      | 0         | -0.02    | 0.02      | -0.02     | -0.07     | -0.01     | 0         |
| Phe                 | 0.07     | -0.01     | 0.12      | 0.07      | -0.21    | -0.41     | -0.38     | -0.22     | -0.03     | 0         |
| Pro                 | 0.02     | -0.07     | 0.14      | 0.1       | -0.15    | -1.24     | -2.34     | -0.04     | -0.48     | 0.03      |
| Ser                 | 0.78     | 0.01      | -0.02     | 0.19      | 0.06     | -0.49     | -0.24     | -0.37     | -0.07     | 0.02      |
| Thr                 | 0.08     | -0.01     | -0.22     | 0.03      | -0.01    | -0.4      | -0.48     | -0.04     | -0.1      |           |
| Tyr                 | 0.05     | -0.02     | 0.07      | 0.03      | 1.24     | -0.24     | -0.59     | -0.36     | 0.22      | -0.03     |
| Val                 | 0.08     | -0.01     | 0.09      | 0.1       | -0.02    | -0.61     | -0.7      | -1.24     | -0.74     | 0.02      |
| <b>Barley (DAA)</b> | <b>4</b> | <b>11</b> | <b>18</b> | <b>25</b> | <b>4</b> | <b>11</b> | <b>18</b> | <b>25</b> | <b>32</b> | <b>53</b> |
| Arg                 | 0.16     | 0.23      | 0.26*     | -0.01     |          | 0.17      | 0.65      | -0.95     | -0.15     | -0.43     |
| Asn                 |          | 0.01      | 0.01*     | 0.01      |          | 9.81      | 4.74      | -2.03     | 3.61      | -0.46     |
| Asp                 | 0.07     | 0.04      | 0.02      | -0.05     |          | 0.48      | -0.15     | -0.32*    | 0.1       | -0.42     |
| GABA                | 0.01     |           |           | 0.01      |          | 0.08      | -0.15     | -0.12     | -0.09     | -0.1      |
| Gln                 | -0.08    | 0.02      | 0.03*     | 0         |          | 2.43      | -0.38     | -1.37     | -0.39     | -0.17     |
| Glu                 | -0.02    | -0.04     | 0.06      | -0.05     |          | 0.61      | -1.03     | -1.59     | 0.23      | 0         |
| Gly                 | -0.28    | -0.01     | 0.03      | 0         |          | 1.69      | -1.7      | -1.81     | -1.64     | -0.01     |
| His                 | 0.03     | 0         | 0.01      |           |          | 0         | -0.01     | -0.04     | -0.03     | 0.05***   |
| Ile                 | -0.11    | 0.04      | 0.02      | 0         |          | -0.18     | -1.29     | -1.32     | 0.01      | -0.34     |
| Leu                 | -0.13    | 0.04      | 0.01      | 0         |          | 0.93      | -1.37     | -0.42     | -0.38     | 0         |
| Lys                 | -0.08    | 0         | 0         | -0.01     |          | 0.27      | -0.6      | -0.14     | -0.16     | 0         |
| Met                 | 0.02     | 0         | 0         | -0.01     |          | 0.2       | -0.1      | -0.11     | -0.04     | -0.03     |
| Phe                 | 0        | 0         | 0.05      | -0.02     |          | 0.1       | -0.84     | -0.55     | -0.18     | 0.01      |
| Pro                 | -0.11    | -0.05     | 0.19*     | 0.1       |          | 5.18*     | 0.79      | -1.01     | -0.03     | 0.02      |
| Ser                 | -0.02    | 0.09      | 0.07*     | 0         |          | 1.43      | 0.06      | -0.01     | -1.98*    | -0.02     |
| Thr                 | 0.09     | 0         | 0.04      | -0.02     |          | 1.16      | -2.22     | -1.21*    | -1.07     | 0.02      |
| Tyr                 | 0.02     | 0         | 0.02      | -0.01     |          | 0.05      | -0.72     | -0.56     | -0.12     | -0.1      |
| Val                 | -0.08    | 0.02      | 0.07      | -0.02     |          | 1.53      | -1.01     | -1.63     | -0.96     | 0.01      |

Statistical differences ( $p<0.05$  \*;  $p<0.01$  \*\*,  $p<0.001$  \*\*\*)

**Table S6.** Statistical analysis of time variation (expressed as days after anthesis, DAA) of the total amino acid (AA) concentration in leaves and grain, and grain weight. Fig. 7 A, B, C and D.

| <b>Trait</b> | <b>Env</b> | <b>Triticale</b>            | <b>R2</b>   | <b>Bread wheat</b>          | <b>R2</b>   | <b>Durum wheat</b>          | <b>R2</b>   | <b>Barley</b>               | <b>R2</b>   |
|--------------|------------|-----------------------------|-------------|-----------------------------|-------------|-----------------------------|-------------|-----------------------------|-------------|
| Grain        | WW         | $y = 33.824\ln(x) - 91.272$ | <b>0.95</b> | $y = 39.706\ln(x) - 113.22$ | <b>0.95</b> | $y = 21.828\ln(x) - 50.038$ | <b>0.82</b> | $y = 15.959\ln(x) - 28.08$  | <b>0.68</b> |
| weight       | WL         | $y = 31.734\ln(x) - 80.884$ | <b>0.96</b> | $y = 40.078\ln(x) - 112.36$ | <b>0.93</b> | $y = 20.777\ln(x) - 45.75$  | <b>0.85</b> | $y = 15.621\ln(x) - 25.541$ | <b>0.81</b> |
| AA           | WW         | $y = -0.5826x + 50.957$     | <b>0.82</b> | $y = -0.4243x + 39.981$     | <b>0.9</b>  | $y = -1.1652x + 71.942$     | <b>0.96</b> | $y = -1.5659x + 87.413$     | <b>0.83</b> |
| grain        | WL         | $y = -0.5552x + 49.151$     | <b>0.84</b> | $y = -0.7166x + 54.03$      | <b>0.66</b> | $y = -1.1967x + 70.137$     | <b>0.78</b> | $y = -1.9554x + 98.278$     | <b>0.73</b> |
| AA           | WW         | $y = -0.2269x + 14.411$     | <b>0.84</b> | $y = -0.1326x + 12.118$     | <b>0.99</b> | $y = -0.2456x + 13.298$     | <b>0.9</b>  | $y = -0.3233x + 14.597$     | <b>0.88</b> |
| leaves       | WL         | $y = -0.0896x + 10.762$     | <b>0.84</b> | $y = -0.1011x + 11.672$     | <b>0.85</b> | $y = -0.2907x + 15.191$     | <b>0.71</b> | $y = -0.2252x + 13.034$     | <b>0.96</b> |

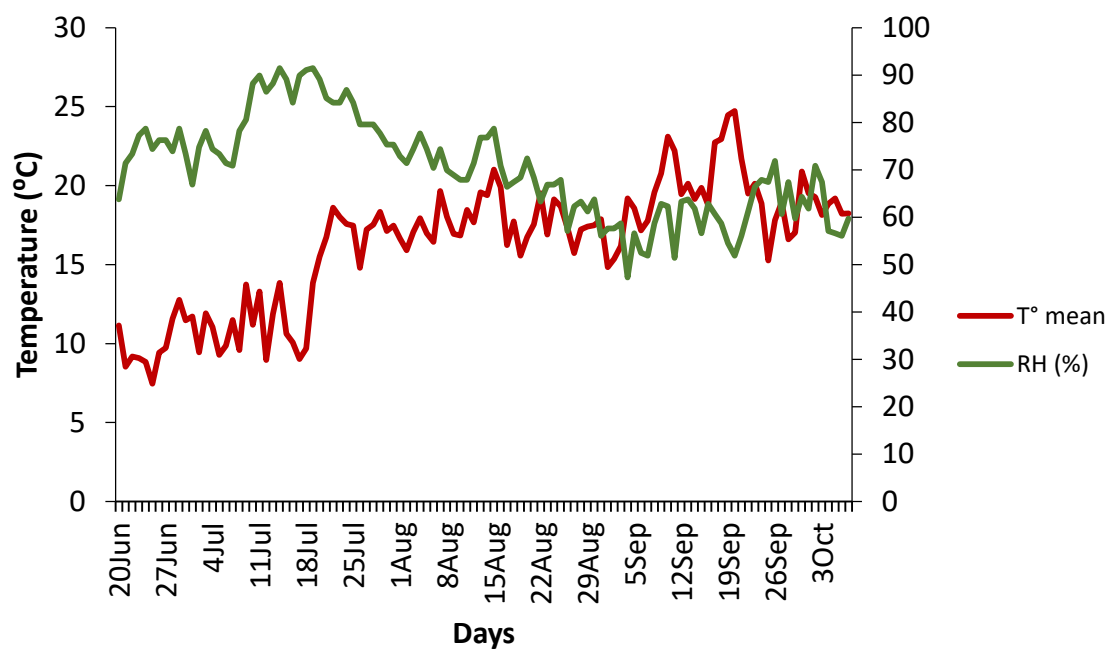

**Figure S1.** Temperature mean ( $T^{\circ}$  mean) and relative humidity in the glasshouse in 2016. Data correspond to one week before the start of measurement.



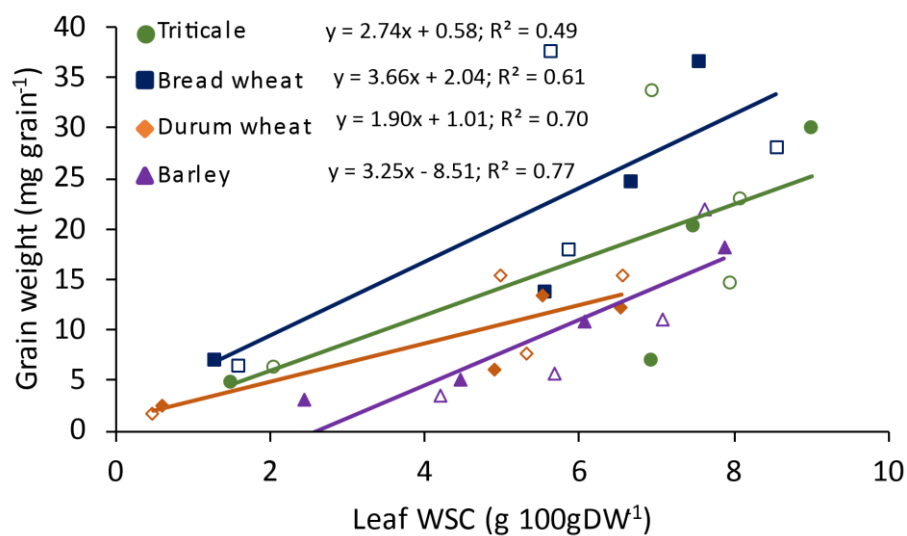

**Figure S2.** Relationship between water-soluble carbohydrate (WSC) content in leaves and the mean weight of the grain during the grain filling stage in triticale, bread wheat, durum wheat and barley, grown under water-limited (open symbols) and well-watered regimes (closed symbols). Values are means of three replicates. There were no statistically significant differences among the slopes.

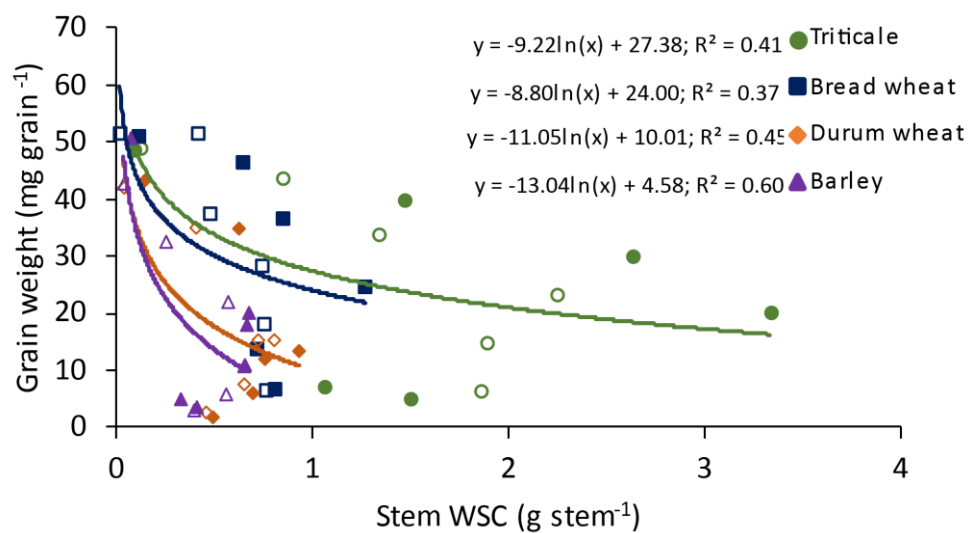

**Figure S3.** Relationship between water-soluble carbohydrate (WSC) content in stems and the weight of a single grain during the grain filling period, of the four cereals triticale, bread wheat, durum wheat and barley, grown under water-limited (open symbols) and well-watered (closed symbols) regimes. Values are means of three replicates.

A) Triticale

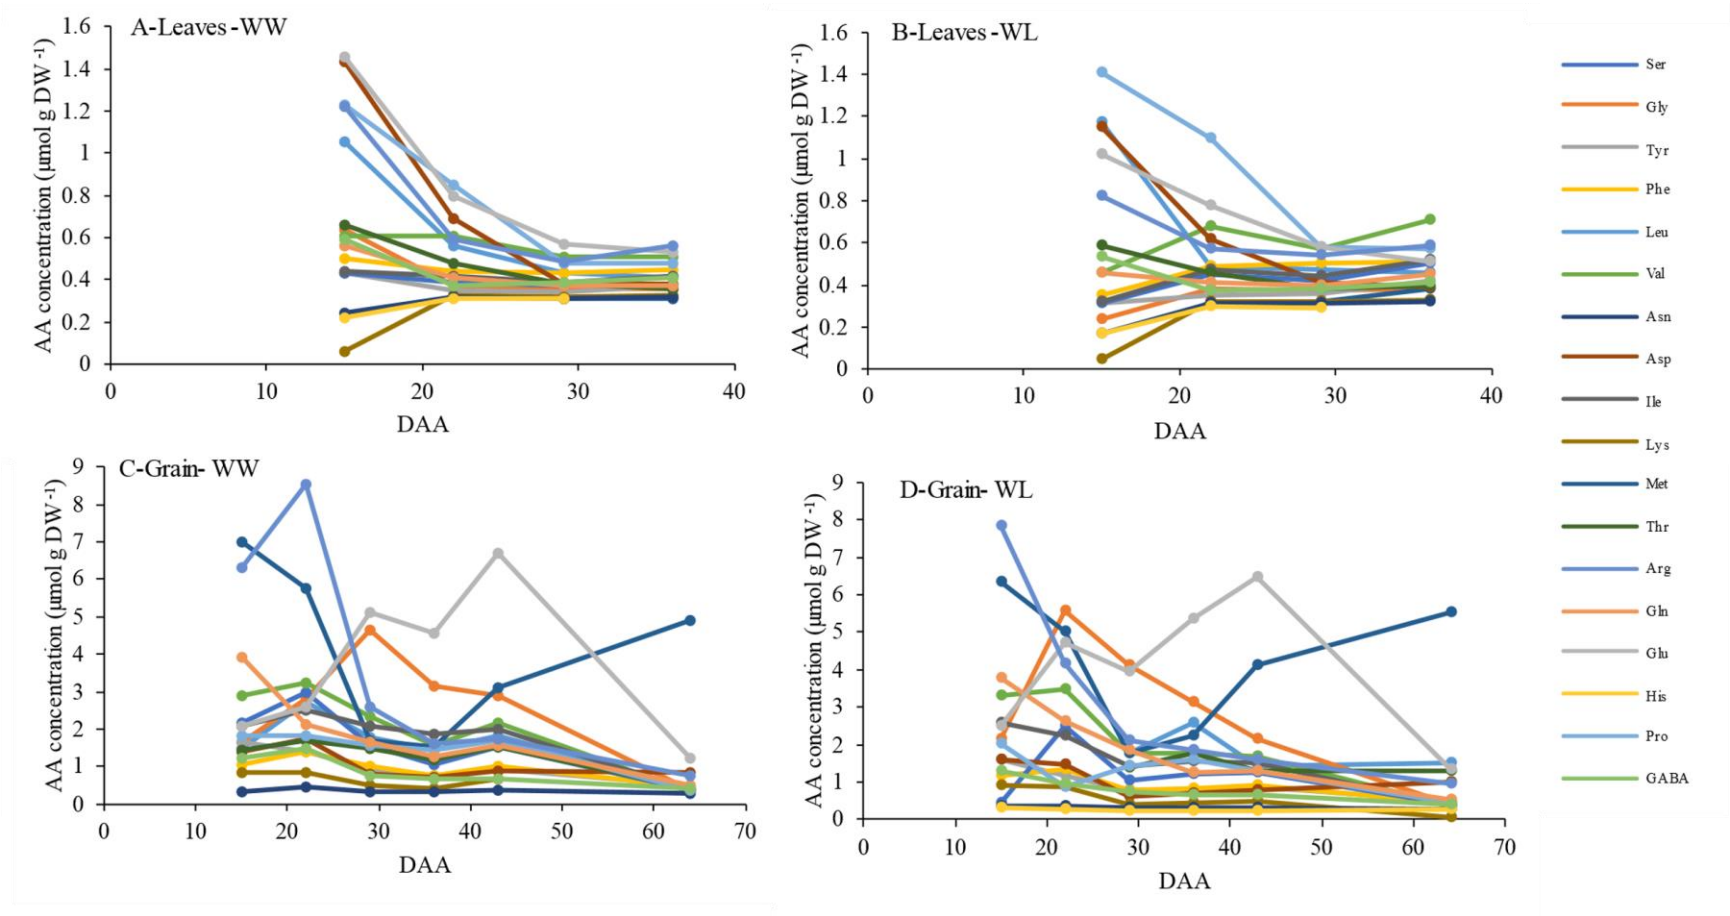

B) Bread wheat

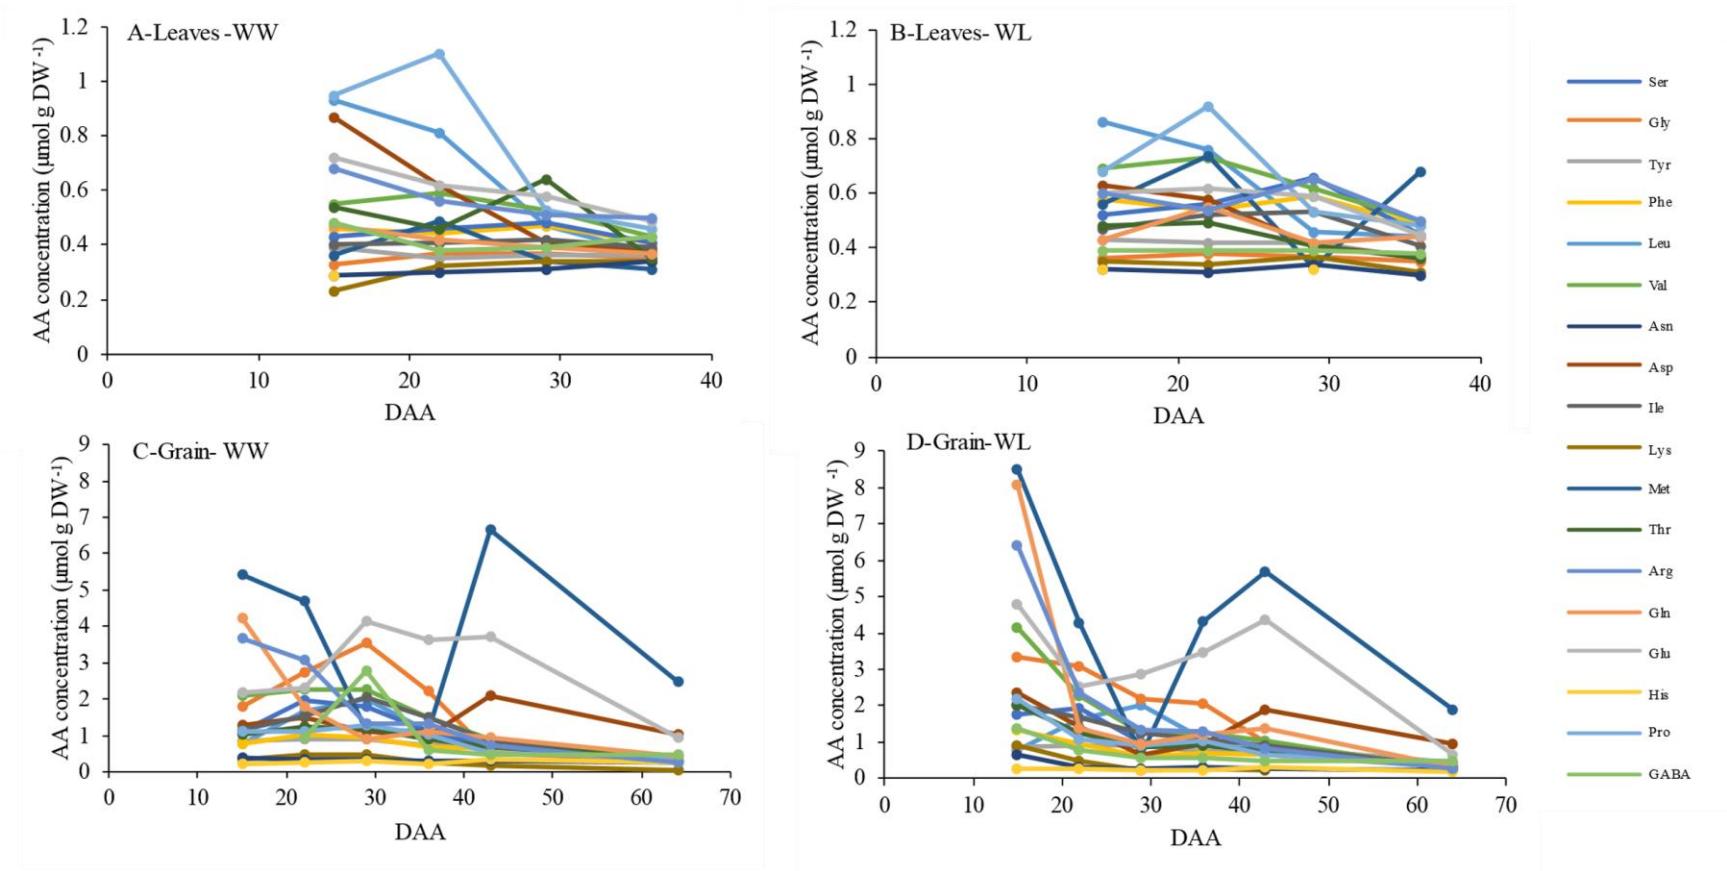

C) Durum wheat

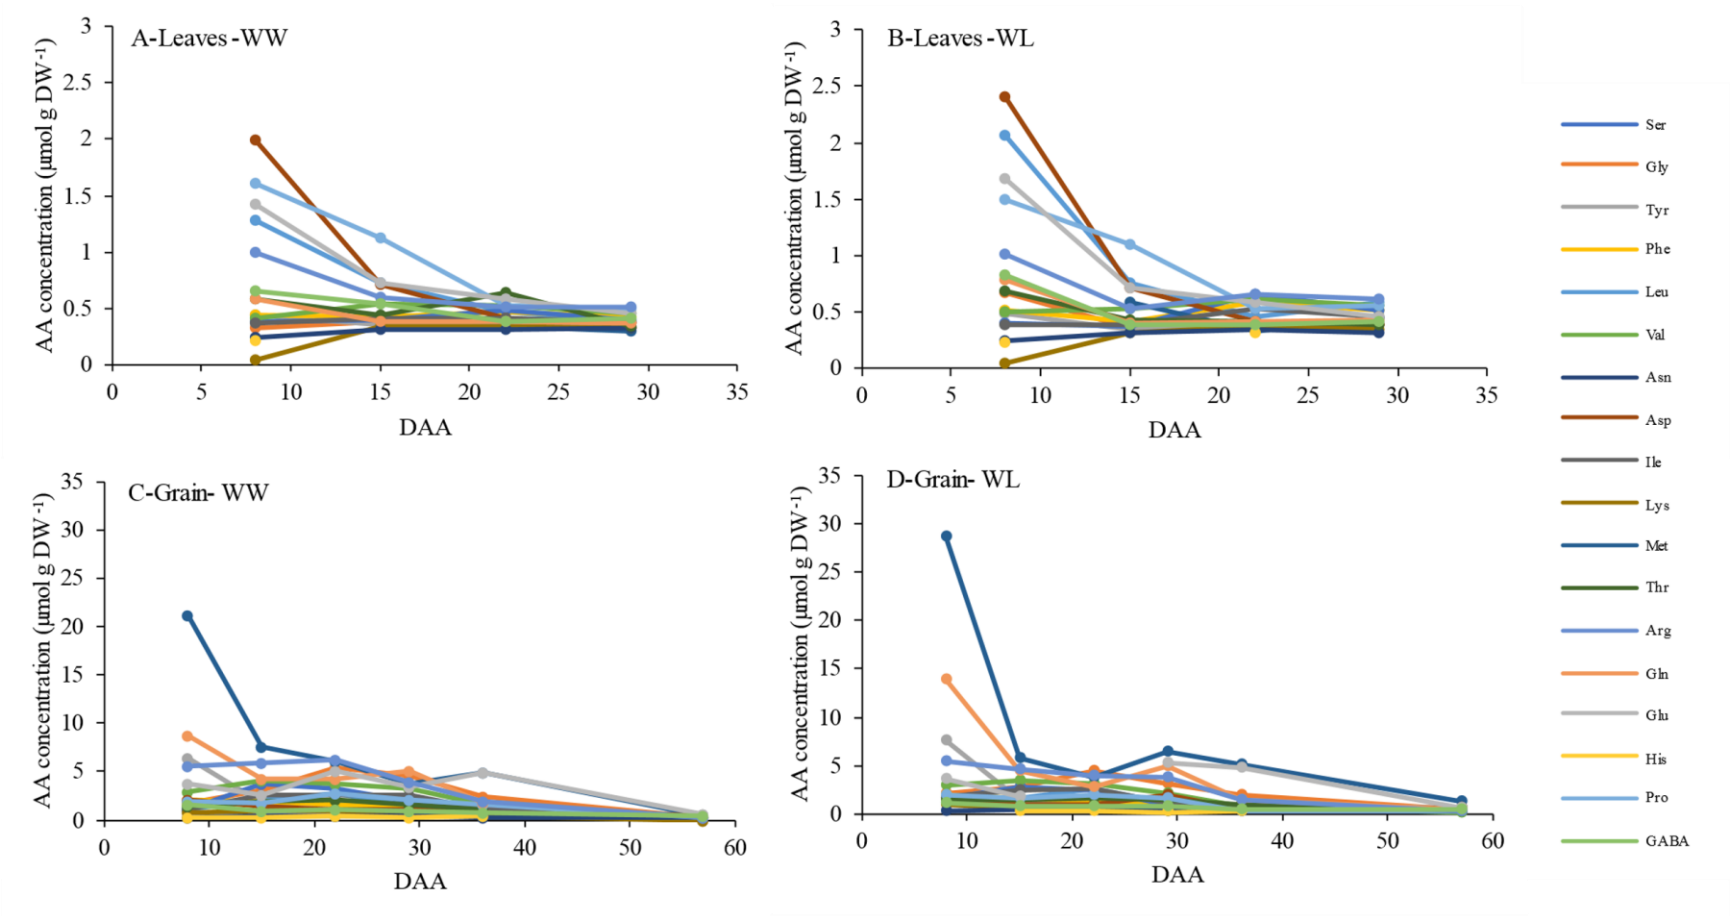

D) Barley

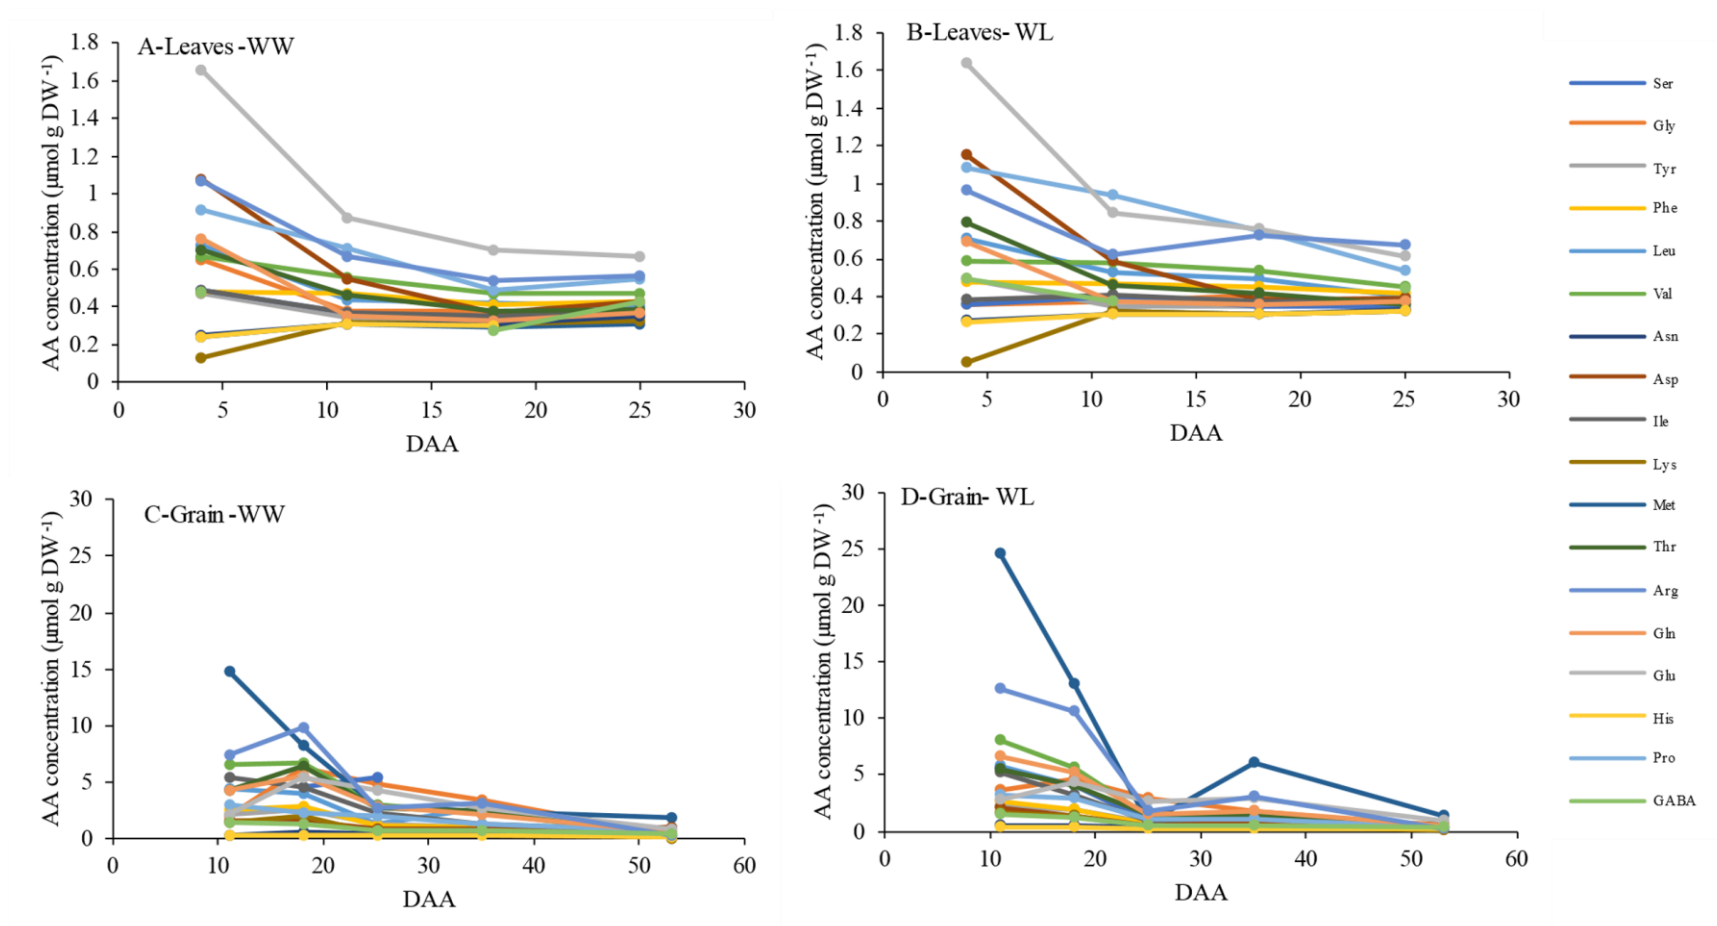

**Figure S4.** Concentration ( $\mu\text{mol g DW}^{-1}$ ) of different amino acids in leaves and grain during the grain filling stage (in days after anthesis DAA) in triticale (A), bread wheat (B), durum wheat (C) and barley (D), grown under well-watered (WW) and water-limited (WL) regimes. Representation of the data sets has been separated according to species and plant part (leaves or grain) for better visualisation of the data.
